# Supplementary material for: Unveiling Integrative Computational Analysis and Functional Profiling of GhSOS1 gene family in response to dual stresses Drought and Salinity in Gossypium hirsutum L.
Source: Research Square preprint supplement (doi:10.21203/rs.3.rs-7788692/v1), 2025-10-22
Supplement: Supplementary file 1 [file 06df5bddb1aa3b927291254e.xlsx]

## Sheet: Sheet1
Table 1: Ka/Ks ratio selection pressure analysis among GhSOS1 genes
Paralog 1	Paralog 2	Ks	Ka	Ka/Ks	Duplication	Evolution
Gohir.A01G036500.1	Gohir.A01G085600.1	2.127	0.939	0.44	Tandem	Purifying
Gohir.A01G036500.1	Gohir.A06G181100.1	0.34	0.078	0.23	Segmental	Purifying
Gohir.A01G036500.1	Gohir.A07G039800.1	1.754	1.595	0.91	Segmental	Purifying
Gohir.A01G036500.1	Gohir.A02G103100.1	2.028	1.371	0.68	Segmental	Purifying
Gohir.A01G036500.1	Gohir.A02G103200.1	1.974	1.361	0.69	Segmental	Purifying
Gohir.A01G036500.1	Gohir.A13G193600.1	2.287	1.545	0.68	Segmental	Purifying
Gohir.A01G036500.1	Gohir.D01G023800.1	0.036	0.016	0.44	Segmental	Purifying
Gohir.A01G036500.1	Gohir.D08G235650.1	3.171	0.955	0.3	Segmental	Purifying
Gohir.A01G036500.1	Gohir.D11G248200.2	2.277	0.976	0.43	Segmental	Purifying
Gohir.A01G036500.1	Gohir.D11G272700.1	2.147	0.987	0.46	Segmental	Purifying
Gohir.A01G085600.1	Gohir.A06G181100.1	2.844	0.905	0.32	Segmental	Purifying
Gohir.A01G085600.1	Gohir.A07G039800.1	3.16	1.615	0.51	Segmental	Purifying
Gohir.A01G085600.1	Gohir.A02G103100.1	2.388	1.35	0.57	Segmental	Purifying
Gohir.A01G085600.1	Gohir.A02G103200.1	2.657	1.357	0.51	Segmental	Purifying
Gohir.A01G085600.1	Gohir.A13G193600.1	2.598	1.601	0.62	Segmental	Purifying
Gohir.A01G085600.1	Gohir.D01G023800.1	2.141	0.938	0.44	Segmental	Purifying
Gohir.A01G085600.1	Gohir.D08G235650.1	2.307	0.33	0.14	Segmental	Purifying
Gohir.A01G085600.1	Gohir.D11G077600.1	1.868	1.536	0.82	Segmental	Purifying
Gohir.A01G085600.1	Gohir.D11G248200.2	2.536	0.351	0.14	Segmental	Purifying
Gohir.A06G181100.1	Gohir.A07G039800.1	1.904	1.653	0.87	Segmental	Purifying
Gohir.A06G181100.1	Gohir.A02G103100.1	2.016	1.389	0.69	Segmental	Purifying
Gohir.A06G181100.1	Gohir.A02G103200.1	2.364	1.328	0.56	Segmental	Purifying
Gohir.A06G181100.1	Gohir.A13G193600.1	2.63	1.576	0.6	Segmental	Purifying
Gohir.A06G181100.1	Gohir.D01G023800.1	0.347	0.069	0.2	Segmental	Purifying
Gohir.A06G181100.1	Gohir.D11G077600.1	2.682	1.629	0.61	Segmental	Purifying
Gohir.A06G181100.1	Gohir.D11G248200.2	2.415	0.913	0.38	Segmental	Purifying
Gohir.A06G181100.1	Gohir.D11G272700.1	2.322	0.925	0.4	Segmental	Purifying
Gohir.A06G181100.1	Gohir.A07G039800.1	1.904	1.653	0.87	Segmental	Purifying
Gohir.A07G039800.1	Gohir.A13G193600.1	2.491	0.182	0.07	Segmental	Purifying
Gohir.A07G039800.1	Gohir.D01G023800.1	1.67	1.618	0.97	Segmental	Purifying
Gohir.A07G039800.1	Gohir.D08G235650.1	1.739	1.708	0.98	Segmental	Purifying
Gohir.A07G039800.1	Gohir.D11G248200.2	1.808	1.64	0.91	Segmental	Purifying
Gohir.A07G039800.1	Gohir.D11G272700.1	1.609	1.636	1.02	Segmental	Diversifying
Gohir.A02G103100.1	Gohir.A02G103200.1	0.207	0.046	0.22	Tandem	Purifying
Gohir.A02G103100.1	Gohir.D01G023800.1	1.998	1.334	0.67	Segmental	Purifying
Gohir.A02G103100.1	Gohir.D01G209600.1	3.178	0.374	0.12	Segmental	Purifying
Gohir.A02G103100.1	Gohir.D08G235650.1	1.616	1.351	0.84	Segmental	Purifying
Gohir.A02G103100.1	Gohir.D11G077600.1	2.684	0.879	0.33	Segmental	Purifying
Gohir.A02G103100.1	Gohir.D11G248200.2	1.95	1.375	0.7	Segmental	Purifying
Gohir.A02G103100.1	Gohir.D11G272700.1	3.064	1.333	0.44	Segmental	Purifying
Gohir.A02G103200.1	Gohir.A13G193600.1	2.396	1.732	0.72	Segmental	Purifying
Gohir.A02G103200.1	Gohir.D01G023800.1	1.918	1.329	0.69	Segmental	Purifying
Gohir.A02G103200.1	Gohir.D08G235650.1	1.796	1.341	0.75	Segmental	Purifying
Gohir.A02G103200.1	Gohir.D11G248200.2	1.997	1.385	0.69	Segmental	Purifying
Gohir.A02G107001.1	Gohir.D06G166000.1	3.138	0.726	0.23	Segmental	Purifying
Gohir.A02G107001.1	Gohir.D11G077600.1	2.833	0.949	0.34	Segmental	Purifying
Gohir.A02G107001.1	Gohir.D11G248200.2	2.362	1.485	0.63	Segmental	Purifying
Gohir.A13G193600.1	Gohir.D01G023800.1	2.127	1.555	0.73	Segmental	Purifying
Gohir.A13G193600.1	Gohir.D08G235650.1	1.842	1.823	0.99	Segmental	Purifying
Gohir.A13G193600.1	Gohir.D11G077600.1	2.316	1.878	0.81	Segmental	Purifying
Gohir.A13G193600.1	Gohir.D11G248200.2	2.022	1.785	0.88	Segmental	Purifying
Gohir.D01G023800.1	Gohir.D11G248200.2	2.519	0.965	0.38	Segmental	Purifying
Gohir.D01G023800.1	Gohir.D11G272700.1	2.258	0.967	0.43	Segmental	Purifying
Gohir.D01G209600.1	Gohir.D06G166000.1	2.662	0.816	0.31	Segmental	Purifying
Gohir.D01G209600.1	Gohir.D11G272700.1	2.244	1.445	0.64	Segmental	Purifying
Gohir.D06G166000.1	Gohir.D08G235650.1	2.751	1.808	0.66	Segmental	Purifying
Gohir.D06G166000.1	Gohir.D11G077600.1	2.27	1.021	0.45	Segmental	Purifying
Gohir.D06G166000.1	Gohir.D11G248200.2	2.582	1.714	0.66	Segmental	Purifying
Gohir.D08G235650.1	Gohir.D11G077600.1	2.276	1.466	0.64	Segmental	Purifying
Gohir.D08G235650.1	Gohir.D11G248200.2	0.491	0.16	0.33	Segmental	Purifying
Gohir.D11G077600.1	Gohir.D11G248200.2	2.599	1.518	0.58	Tandem	Purifying
Gohir.D11G077600.1	Gohir.D11G272700.1	1.464	1.551	1.06	Tandem	Diversifying
