# Supplementary material for: Unveiling Integrative Computational Analysis and Functional Profiling of GhSOS1 gene family in response to dual stresses Drought and Salinity in Gossypium hirsutum L.
Source: Research Square preprint supplement (doi:10.21203/rs.3.rs-7788692/v1), 2025-10-22
Supplement: Supplementary file 2 [file 9aa5362b8c28929d67265c6a.xlsx]

## Sheet: Sheet1
Table 2: Physiochemical properties of GhSOS1 proteins
Transcript ID	Gene Name	Start	End		Strand	CDS (bp)	Protein length (AA)	MW(kDa)	pI
				Ch.no.
Gohir.A01G036500.1.p	GhSOS1-1	2907644	2914117	A01	Forward	1455	525	57682.8	5.83
Gohir.A01G085600.1.p	GhSOS1-2	12718712	12722123	A01	Reverse	1563	520	58385.6	7.65
Gohir.A06G181100.1.p	GhSOS1-3	123551254	123560921	A06	Forward	1572	523	57725.6	5.35
Gohir.A07G039800.1.p	GhSOS1-4	5201392	5208768	A07	Reverse	1728	575	62278.1	5.91
Gohir.A02G103100.1.p	GhSOS1-5	47530475	47534471	A02	Forward	2403	800	86844.9	8.63
Gohir.A02G103200.1.p	GhSOS1-6	47628984	47631749	A02	Forward	774	802	86783.6	8.7
Gohir.A02G107001.1.p	GhSOS1-7	53796550	53799059	A02	Reverse	2115	704	76359.8	8.99
Gohir.A13G193600.1.p	GhSOS1-8	106866865	106874598	A13	Forward	1800	599	64659.6	6.03
Gohir.D01G023800.1.p	GhSOS1-9	2596207	2602613	D01	Forward	1344	515	56877.9	5.51
Gohir.D01G209600.1.p	GhSOS1-10	64539990	64545894	D01	Reverse	2484	827	90258.7	8.17
Gohir.D06G166000.1.p	GhSOS1-11	58829180	58832616	D06	Forward	2472	823	90511.2	8.49
Gohir.D08G235650.1.p	GhSOS1-12	66082200	66087538	D08	Forward	1722	573	63860.6	8.09
Gohir.D11G077600.1.p	GhSOS1-13	6530454	6533042	D11	Forward	2361	786	87643.4	6.43
Gohir.D11G248200.2.p	GhSOS1-14	54223810	54227732	D11	Reverse	1605	534	59734.2	8.64
Gohir.D11G272700.1.p	GhSOS1-15	61187575	61191154	D11	Reverse	1629	542	59787.8	6
