# Supplementary material for: Unveiling Integrative Computational Analysis and Functional Profiling of GhSOS1 gene family in response to dual stresses Drought and Salinity in Gossypium hirsutum L.
Source: Research Square preprint supplement (doi:10.21203/rs.3.rs-7788692/v1), 2025-10-22
Supplement: Supplementary file 3 [file eb630a7d4a48000354127735.docx]

**Table S1. Primer details**

|  | **Primers for expression study** | | |
| --- | --- | --- | --- |
| **S.No** | **Transcripts/Genes** | **Forward primer (5’ to 3’)** | **Reverse primer (5’ to 3’)** |
| 1 | GhUBQ14  (Housekeeping) | CAACGCTCCATCTTGTCCTT | TGATCGTCTTTCCCGTAAGC |
| 2 | *GhSOS1-4* | GGTGGTGCTATCATACGCGA | GTCGCCGACGAATTCACAAG |
| 3 | *GhSOS1-5* | AACAGCAGTTTTGGCAGCAG | CTAGGGCACCAGCAAATGGA |
| 4 | *GhSOS1-10* | CCAACAACACGATACGGTGC | TTGATATCTCCCCCGTGCCT |
| 5 | *GhSOS1-11* | CCAACAACACGATACGGTGC | TTGATATCTCCCCCGTGCCT |
| 6 | *GhSOS1-13* | TGGATCGTGGACAAACTGGG | GCCGCCAAAGAAGAAGGTTG |
